# Supplementary material for: Biological sex and age influence GS-9620 activity ex vivo
Source: JCI journal article supplement (doi:10.1172/jci.insight.182242), 2025-05-06
Supplement: sd1 [file 1]

## Supplementary Materials for

### **Biological sex and age influence GS-9620 activity *ex vivo***

Carissa S. Holmberg, Callie Levinger, Adam Ward, and Alberto Bosque

Corresponding author: [abosque@gwu.edu](mailto:abosque@gwu.edu)

The PDF file includes:

Table 1

Figures S1 to S13

| Donor ID | Symbol            | Source                | Biological sex | Age  | Race/ethnicity | Height (cm) | Weight (kg) | Blood type | Smoker status | BMI  |
|----------|-------------------|-----------------------|----------------|------|----------------|-------------|-------------|------------|---------------|------|
| D001     | Circle            | STEMCELL              | Female         | 17   | Mixed          | 166         | 84          | O+         | No            | 30.5 |
| D002     | Asterisk          | STEMCELL              | Male           | 30   | Caucasian      | 170         | 80          | A+         | No            | 27.7 |
| D003     | Circle            | STEMCELL              | Male           | 32   | Caucasian      | 177         | 82          | A+         | yes           | 26.2 |
| D004     | Square            | STEMCELL              | Female         | 26   | Asian          | 159         | 58          | AB+        | No            | 22.9 |
| D005     | Diamond           | STEMCELL              | Female         | 36   | Caucasian      | 165         | 92          | O+         | no            | 33.8 |
| D006     | Square            | STEMCELL              | Male           | 50   | Caucasian      | 173         | 116         | A+         | yes           | 38.8 |
| D007     | Diamond           | STEMCELL              | Male           | 43   | Mixed          | 183         | 110         | O+         | no            | 32.8 |
| D008     | Hexagon           | STEMCELL              | Female         | 23   | Mixed          | 166         | 84          | O+         | no            | 30.5 |
| D009     | Hexagon           | STEMCELL              | Male           | 28   | Asian          | 169         | 75          | O+         | no            | 26.3 |
| D010     | Triangle          | STEMCELL              | Female         | 34   | Caucasian      | 157         | 95          | O-         | no            | 38.5 |
| D011     | Triangle          | STEMCELL              | Male           | 23   | Caucasian      | 198         | 152         | A+         | yes           | 38.8 |
| D012     | Inverted Triangle | STEMCELL              | Female         | 43   | Caucasian      | 185         | 76          | B-         | yes           | 22.2 |
| D013     | Inverted Triangle | STEMCELL              | Male           | 19   | Caucasian      | 179         | 75          | O+         | yes           | 23.4 |
| D014     | Square with X     | STEMCELL              | Female         | 53   | Caucasian      | 170         | 91          | O+         | no            | 31.5 |
| D015     | Square with X     | STEMCELL              | Male           | 30   | Asian          | 180         | 79          | O+         | no            | 24.4 |
| D016     | Cross             | Gulf Coast Blood Bank | Female         | 65   | N/A            | N/A         | N/A         | O+         | N/A           | N/A  |
| D017     | X                 | Gulf Coast Blood Bank | Female         | 61   | N/A            | N/A         | N/A         | O+         | N/A           | N/A  |
| D018     | Asterisk          | Gulf Coast Blood Bank | Female         | 42   | N/A            | N/A         | N/A         | B+         | N/A           | N/A  |
| D019     | X                 | Gulf Coast Blood Bank | Male           | 68   | N/A            | N/A         | N/A         | O+         | N/A           | N/A  |
| D020     | Cross             | Gulf Coast Blood Bank | Male           | 65   | N/A            | N/A         | N/A         | A+         | N/A           | N/A  |
| D021     | Circle with x     | Gulf Coast Blood Bank | Female         | 58.9 | N/A            | N/A         | N/A         | A+         | N/A           | N/A  |

**Table 1.** Table of donors for GS-9620-mediated immune activation.

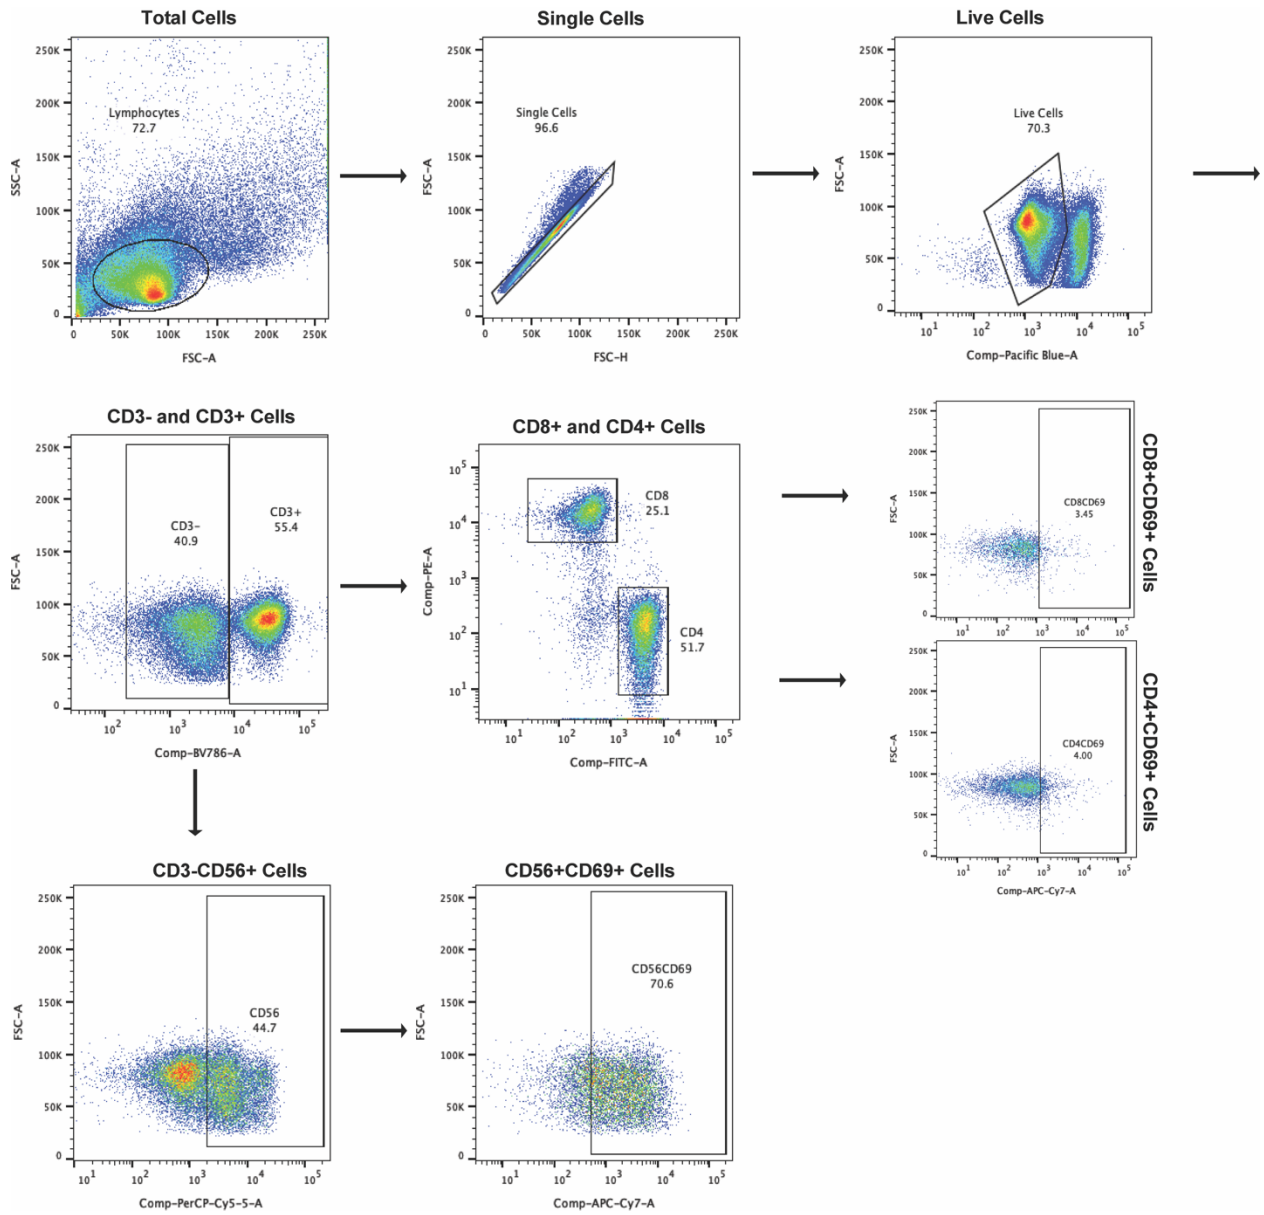

**SF1. Representative flow plot of PBMCs.**

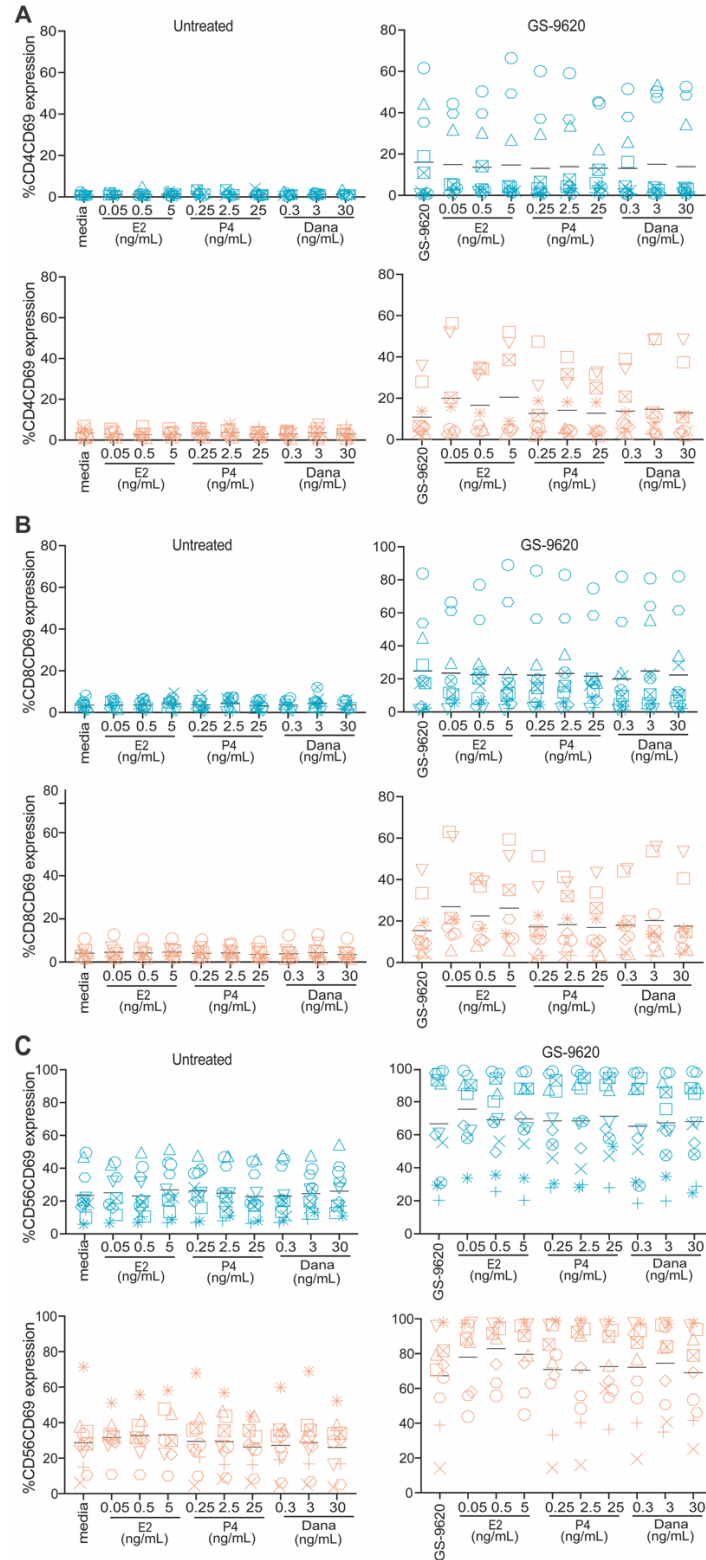

**SF2. Analysis of GS-9620-mediated CD4 T cells, CD8 T cells, and CD56 cell activation in PBMCs in the presence of sex hormones.** %CD4CD69 positive cells in untreated and hormone treatments of estradiol (E2), progesterone (P4), and danazol (dana) alone (left panel) or in the presence of GS-9620 (right panel), %CD8CD69 positive cells (B), and %CD56CD69 positive cells (C). Teal symbols are female donors, and peach symbols are male donors.

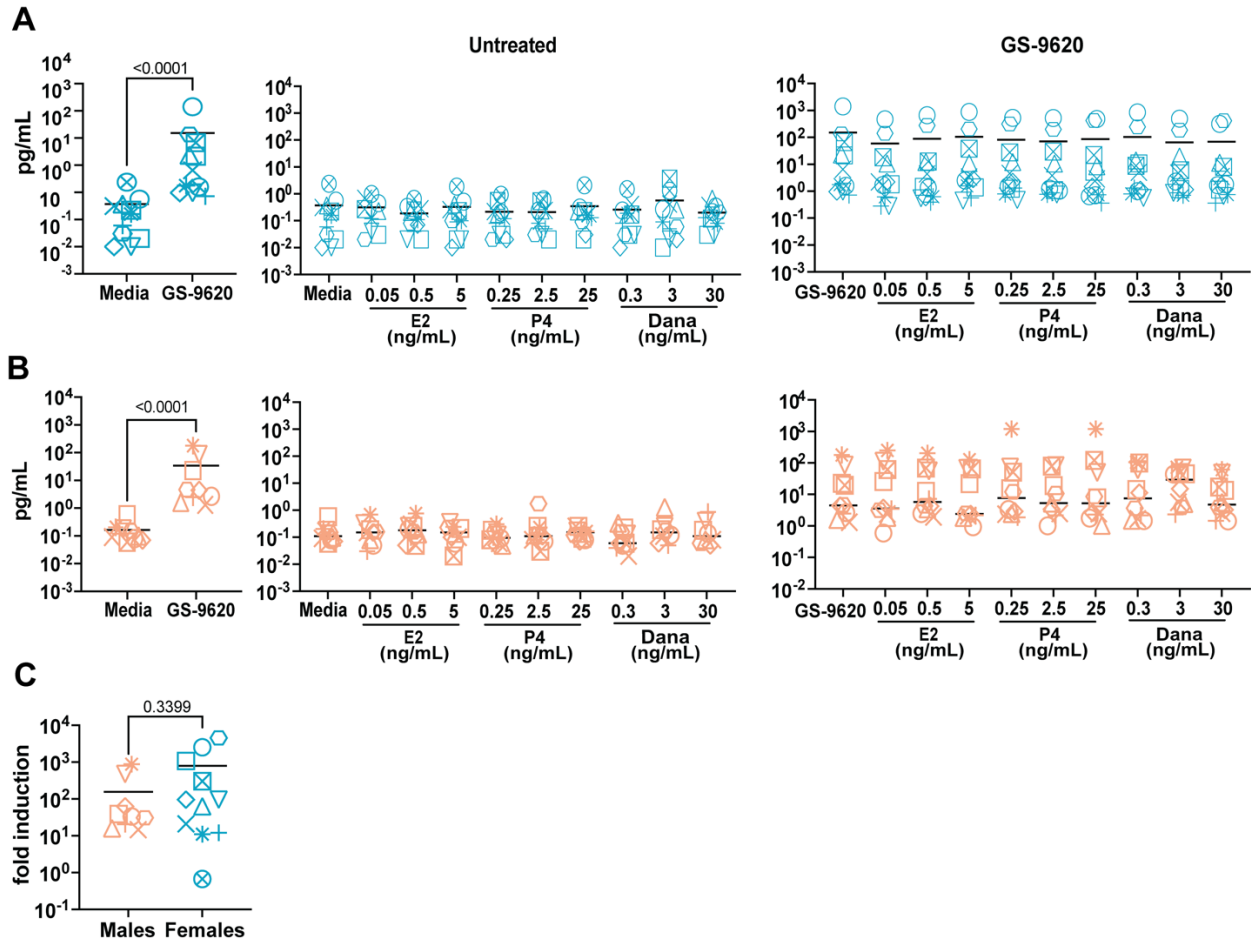

**SF3. Analysis of GS-9620-mediated IL-12 induction in PBMCs in the presence of sex hormones.** IL-12 production before and after stimulation with GS-9620 (first panel), hormone treatments of estradiol (E2), progesterone (P4), and danazol (dana) alone (middle panel), or in the presence of GS-9620 (right panel). Teal symbols are female donors (A), and peach symbols are male donors (B). (C) Fold induction of IL-12 production by biological sex. Mann-Whitney test was used to calculate p values.

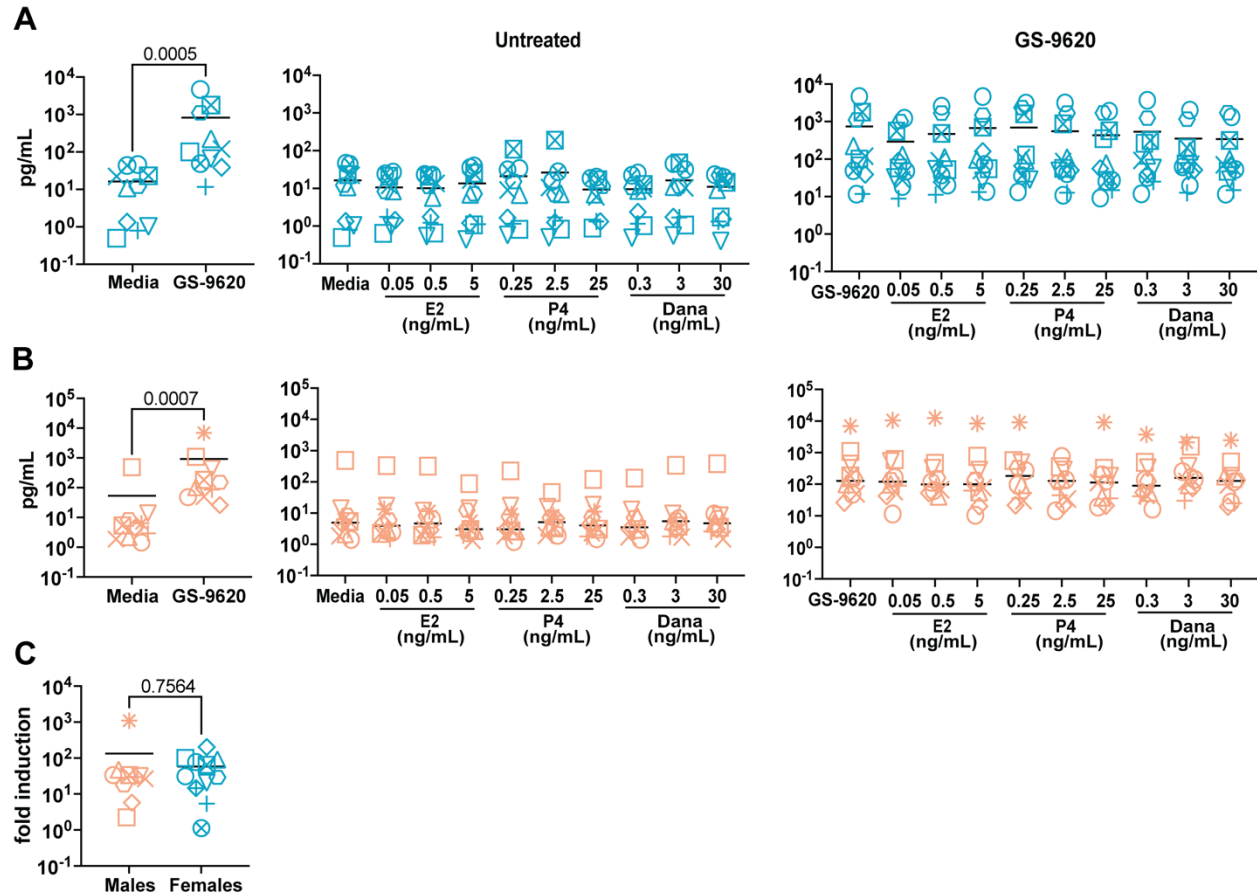

**SF4. Analysis of GS-9620-mediated TNF- $\alpha$  induction in PBMCs in the presence of sex hormones.** TNF- $\alpha$  production before and after stimulation with GS-9620 (first panel), hormone treatments of estradiol (E2), progesterone (P4), and danazol (dana) alone (middle panel), or in the presence of GS-9620 (right panel). Teal symbols are female donors (A), and peach symbols are male donors (B). (C) Fold induction of TNF- $\alpha$  production by biological sex. Mann-Whitney test was used to calculate p values.

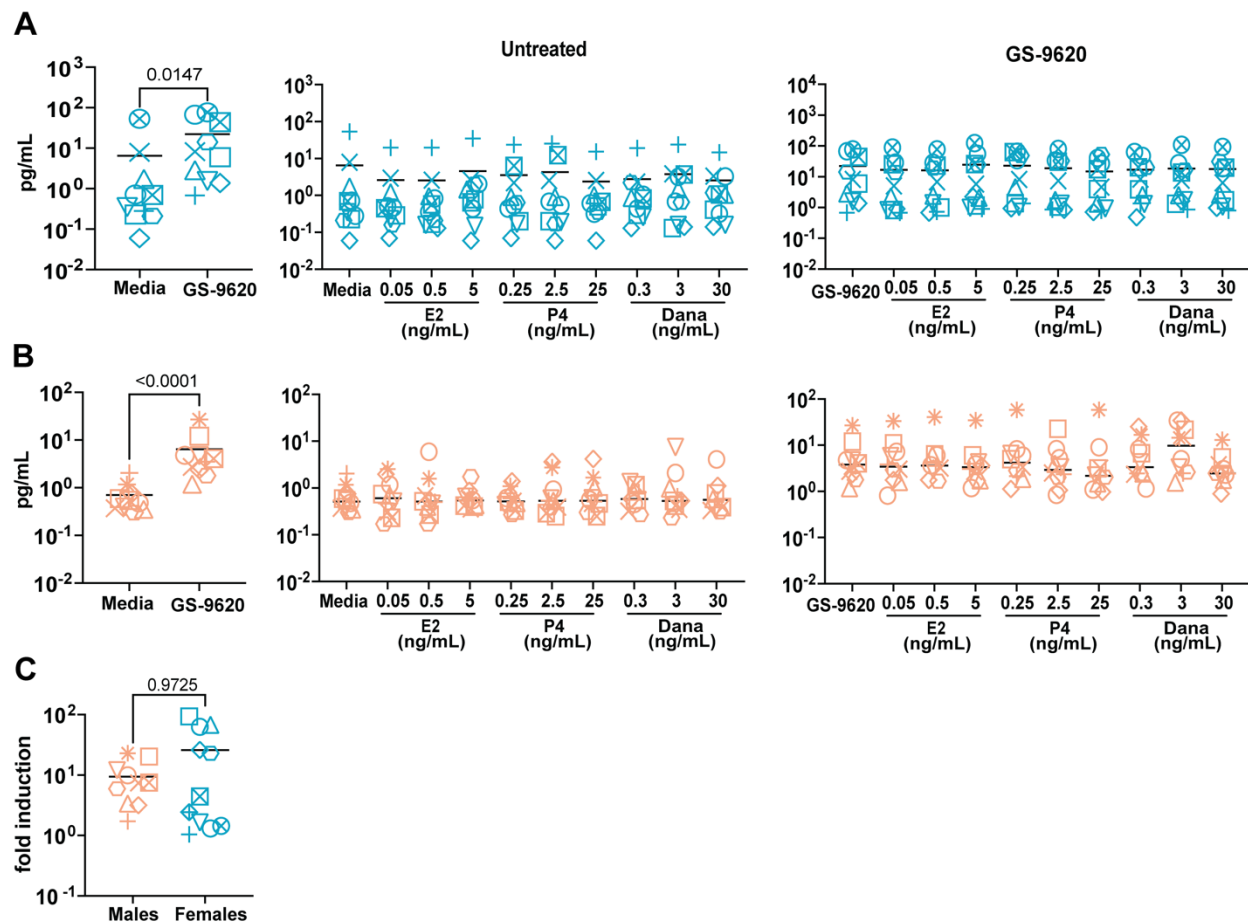

**SF5. Analysis of GS-9620-mediated IL-1 $\beta$  induction in PBMCs in the presence of sex hormones.** IL-1 $\beta$  production before and after stimulation with GS-9620 (first panel), hormone treatments of estradiol (E2), progesterone (P4), and danazol (dana) alone (middle panel), or in the presence of GS-9620 (right panel). Teal symbols are female donors (A), and peach symbols are male donors (B). (C) Fold induction of IL-1 $\beta$  production by biological sex. Mann-Whitney test was used to calculate p values.

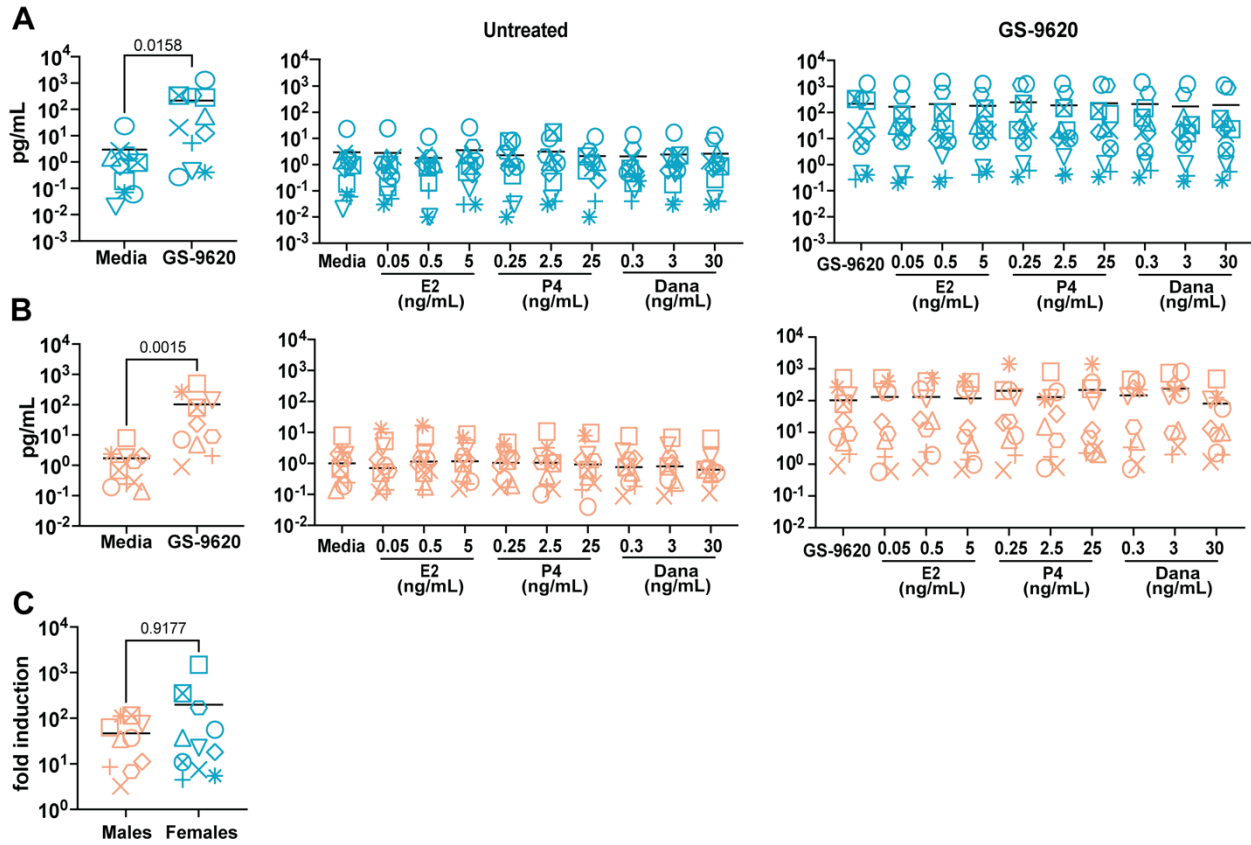

**SF6. Analysis of GS-9620-mediated IFN- $\gamma$  induction in PBMCs in the presence of sex hormones.** IFN- $\gamma$  production before and after stimulation with GS-9620 (first panel), hormone treatments of estradiol (E2), progesterone (P4), and danazol (dana) alone (middle panel), or in the presence of GS-9620 (right panel). Teal symbols are female donors (A), and peach symbols are male donors (B). (C) Fold induction of IFN- $\gamma$  production by biological sex. Mann-Whitney test was used to calculate p values.

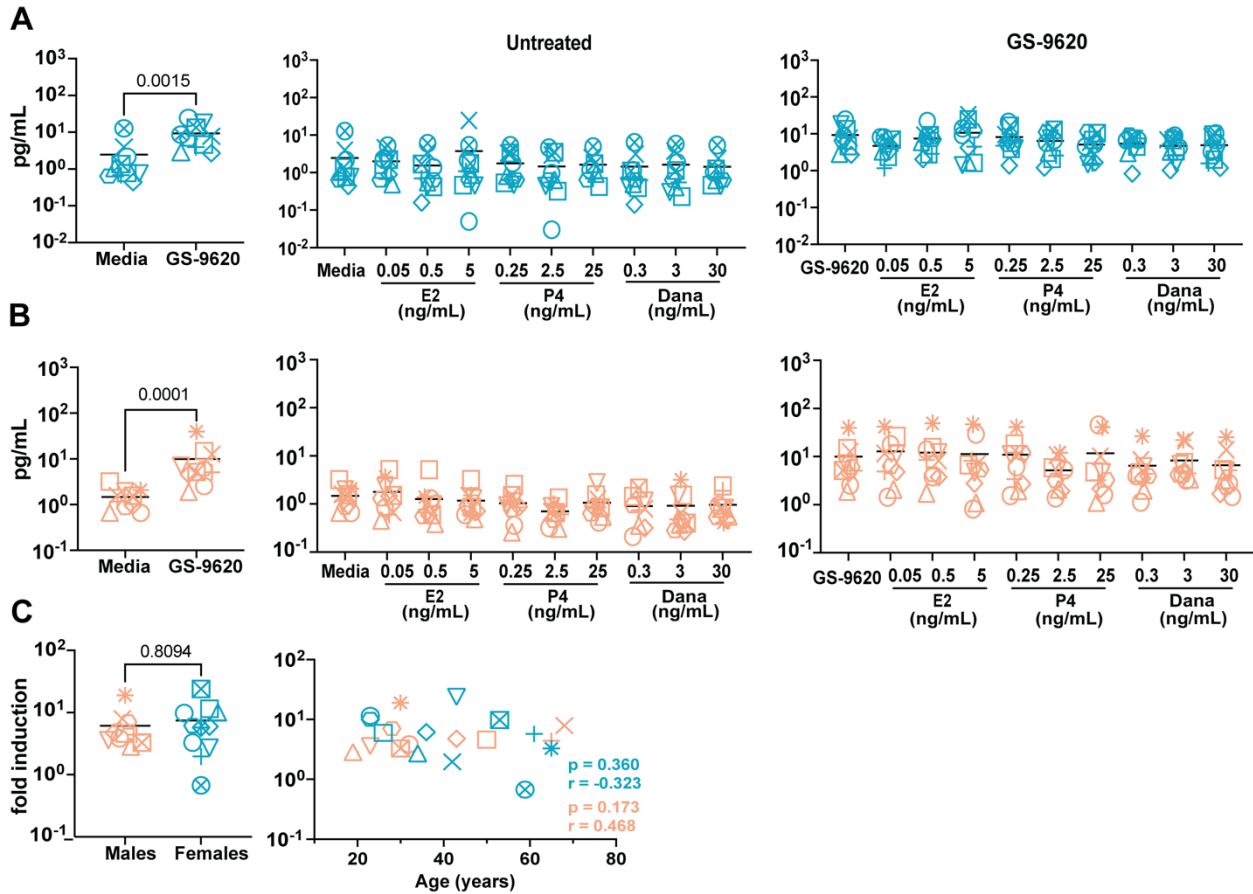

**SF7. Analysis of GS-9620-mediated IL-4 induction in PBMCs in the presence of sex hormones.** IL-4 production before and after stimulation with GS-9620 (first panel), hormone treatments of estradiol (E2), progesterone (P4), and danazol (dana) alone (middle panel), or in the presence of GS-9620 (right panel). Teal symbols are female donors (A), and peach symbols are male donors (B). (C) Fold induction of IL-4 production by biological sex (left) and age (right). Mann-Whitney test and nonparametric spearman correlation were used to calculate p values.

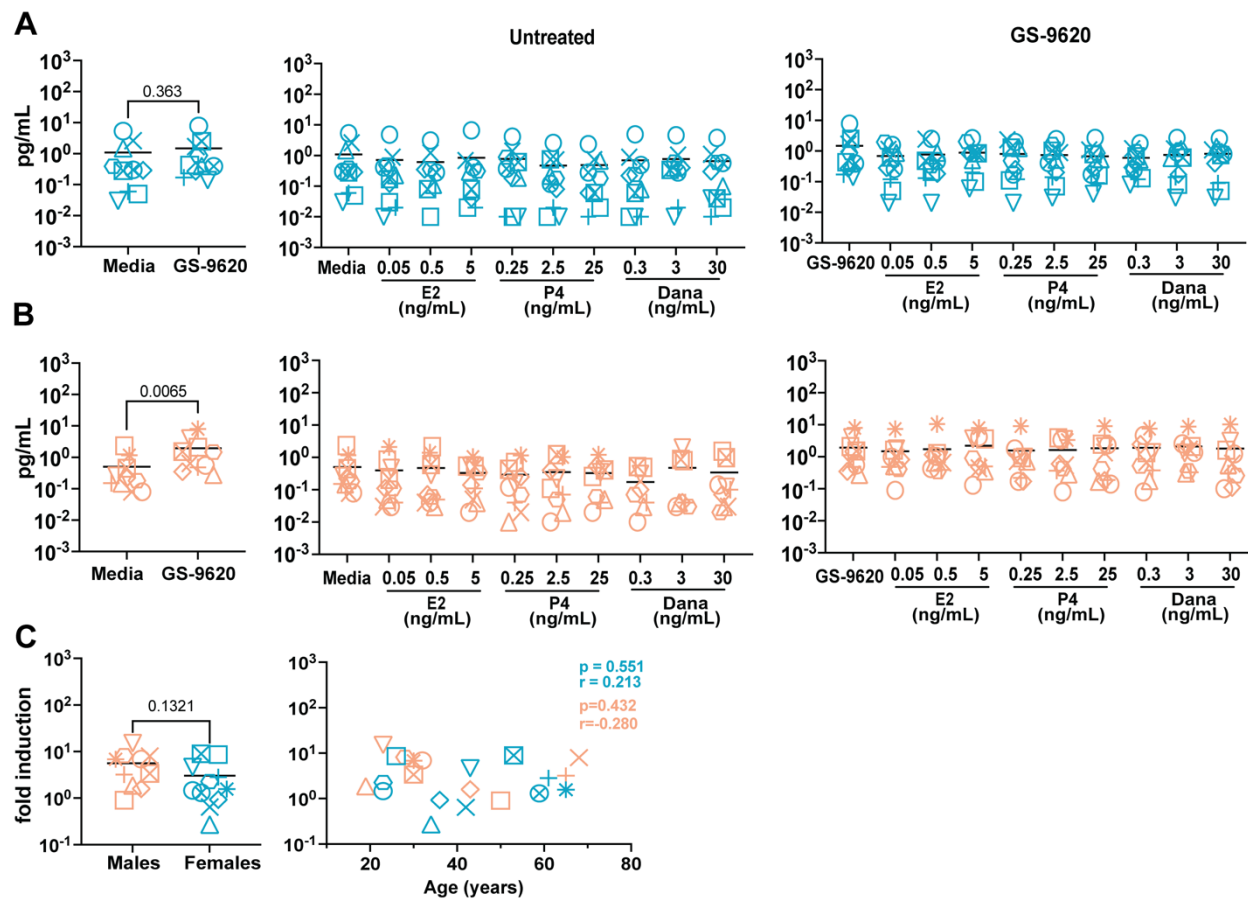

**SF8. Analysis of GS-9620-mediated IL-5 induction in PBMCs in the presence of sex hormones.** IL-5 production before and after stimulation with GS-9620 (first panel), hormone treatments of estradiol (E2), progesterone (P4), and danazol (dana) alone (middle panel), or in the presence of GS-9620 (right panel). Teal symbols are female donors (A), and peach symbols are male donors (B). (C) Fold induction of IL-5 production by biological sex (left) and age (right). Mann-Whitney test and nonparametric spearman correlation were used to calculate p values.

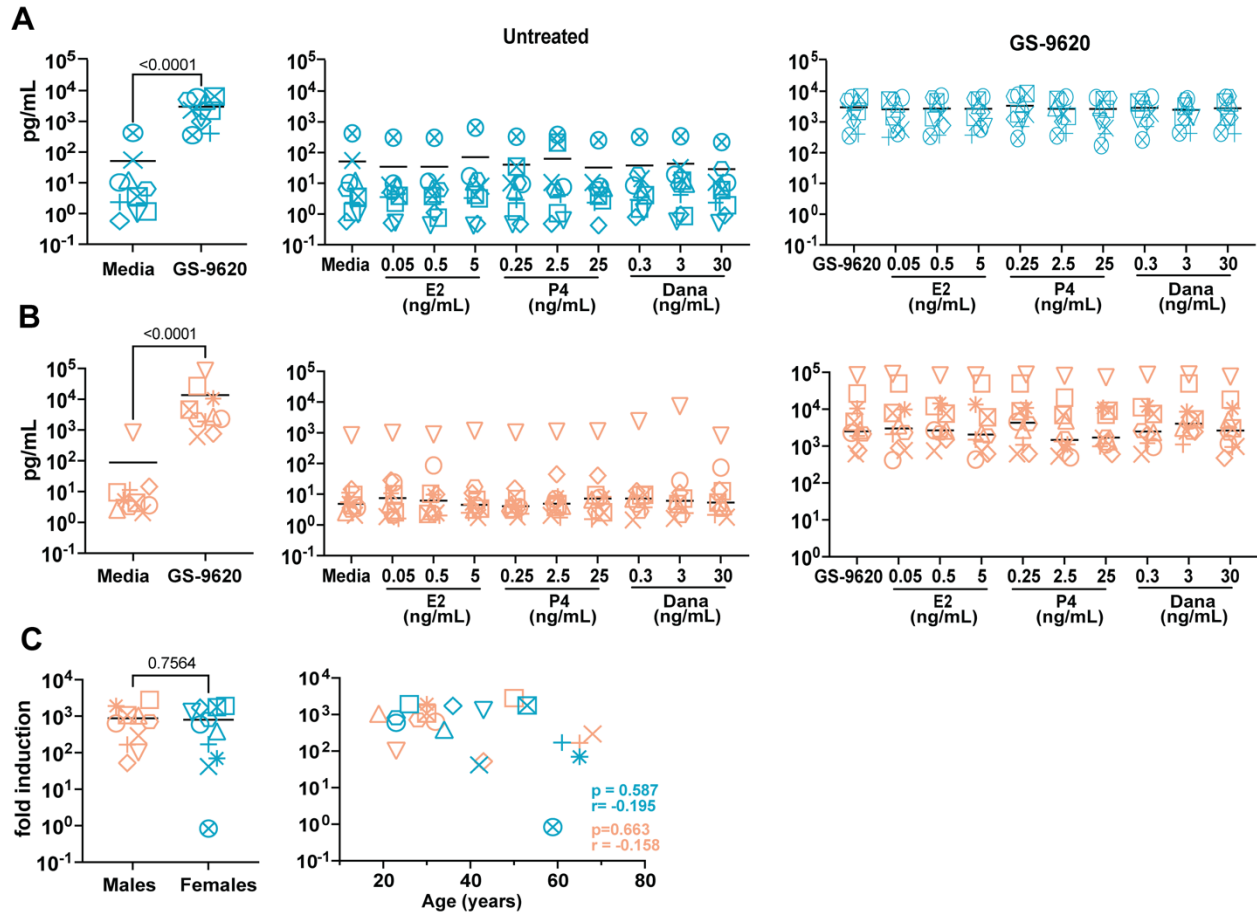

**SF9. Analysis of GS-9620-mediated IL-6 induction in PBMCs in the presence of sex hormones.** IL-6 production before and after stimulation with GS-9620 (first panel), hormone treatments of estradiol (E2), progesterone (P4), and danazol (dana) alone (middle panel), or in the presence of GS-9620 (right panel). Teal symbols are female donors (A), and peach symbols are male donors (B). (C) Fold induction of IL-6 production by biological sex (left) and age (right). Mann-Whitney test and nonparametric spearman correlation were used to calculate p values.

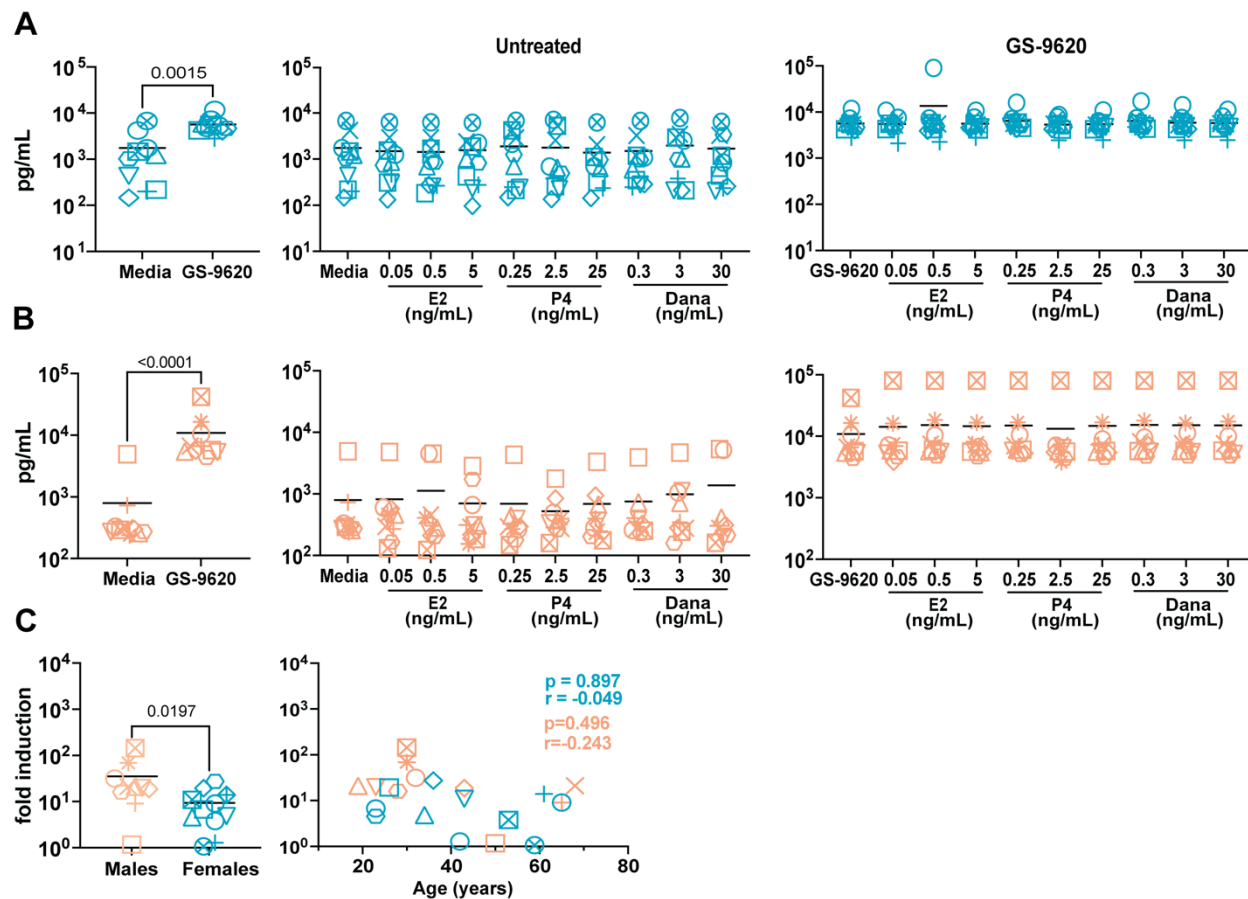

**SF10. Analysis of GS-9620-mediated IL-8 induction in PBMCs in the presence of sex hormones.** IL-8 production before and after stimulation with GS-9620 (first panel), hormone treatments of estradiol (E2), progesterone (P4), and danazol (dana) alone (middle panel), or in the presence of GS-9620 (right panel). Teal symbols are female donors (A), and peach symbols are male donors (B). (C) Fold induction of IL-8 production by biological sex (left) and age (right). Mann-Whitney test and nonparametric spearman correlation were used to calculate p values.

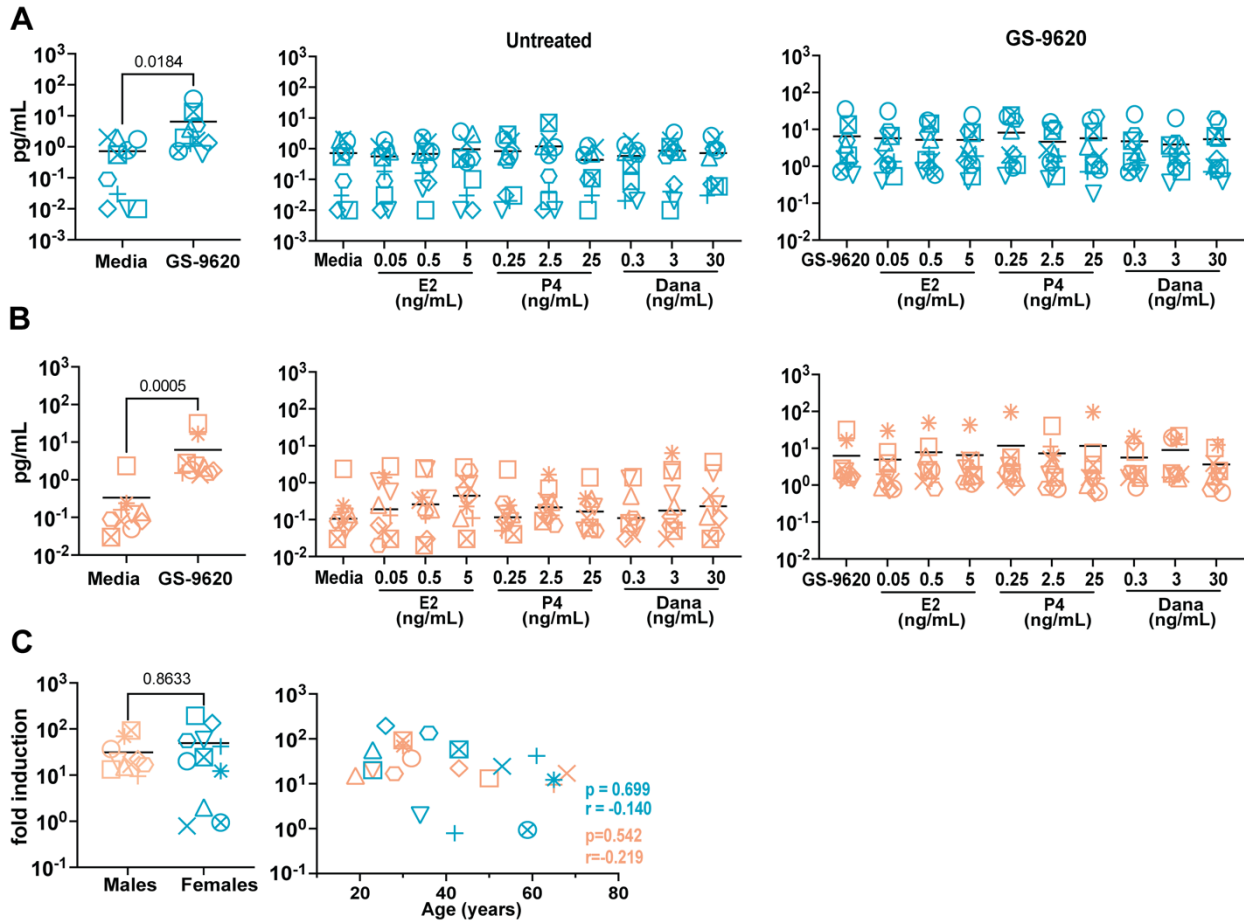

**SF11. Analysis of GS-9620-mediated IL-22 induction in PBMCs in the presence of sex hormones.** IL-22 production before and after stimulation with GS-9620 (first panel), hormone treatments of estradiol (E2), progesterone (P4), and danazol (dana) alone (middle panel), or in the presence of GS-9620 (right panel). Teal symbols are female donors (A), and peach symbols are male donors (B). (C) Fold induction of IL-22 production by biological sex (left) and age (right). Mann-Whitney test and nonparametric spearman correlation were used to calculate p values.

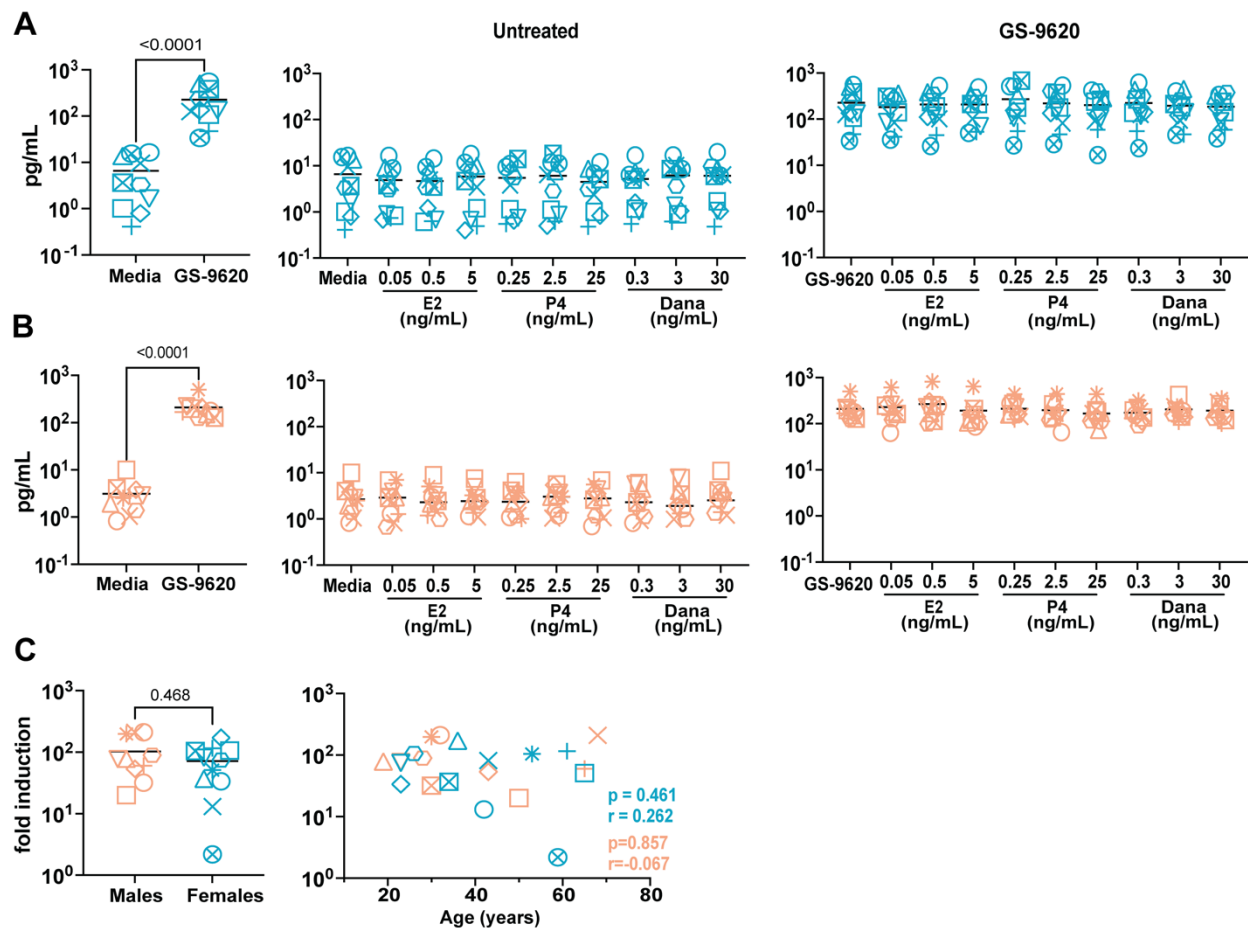

**SF12. Analysis of GS-9620-mediated IL-10 induction in PBMCs in the presence of sex hormones.** IL-10 production before and after stimulation with GS-9620 (first panel), hormone treatments of estradiol (E2), progesterone (P4), and danazol (dana) alone (middle panel), or in the presence of GS-9620 (right panel). Teal symbols are female donors (A), and peach symbols are male donors (B). (C) Fold induction of IL-10 production by biological sex (left) and age (right). Mann-Whitney test and nonparametric spearman correlation were used to calculate p values.

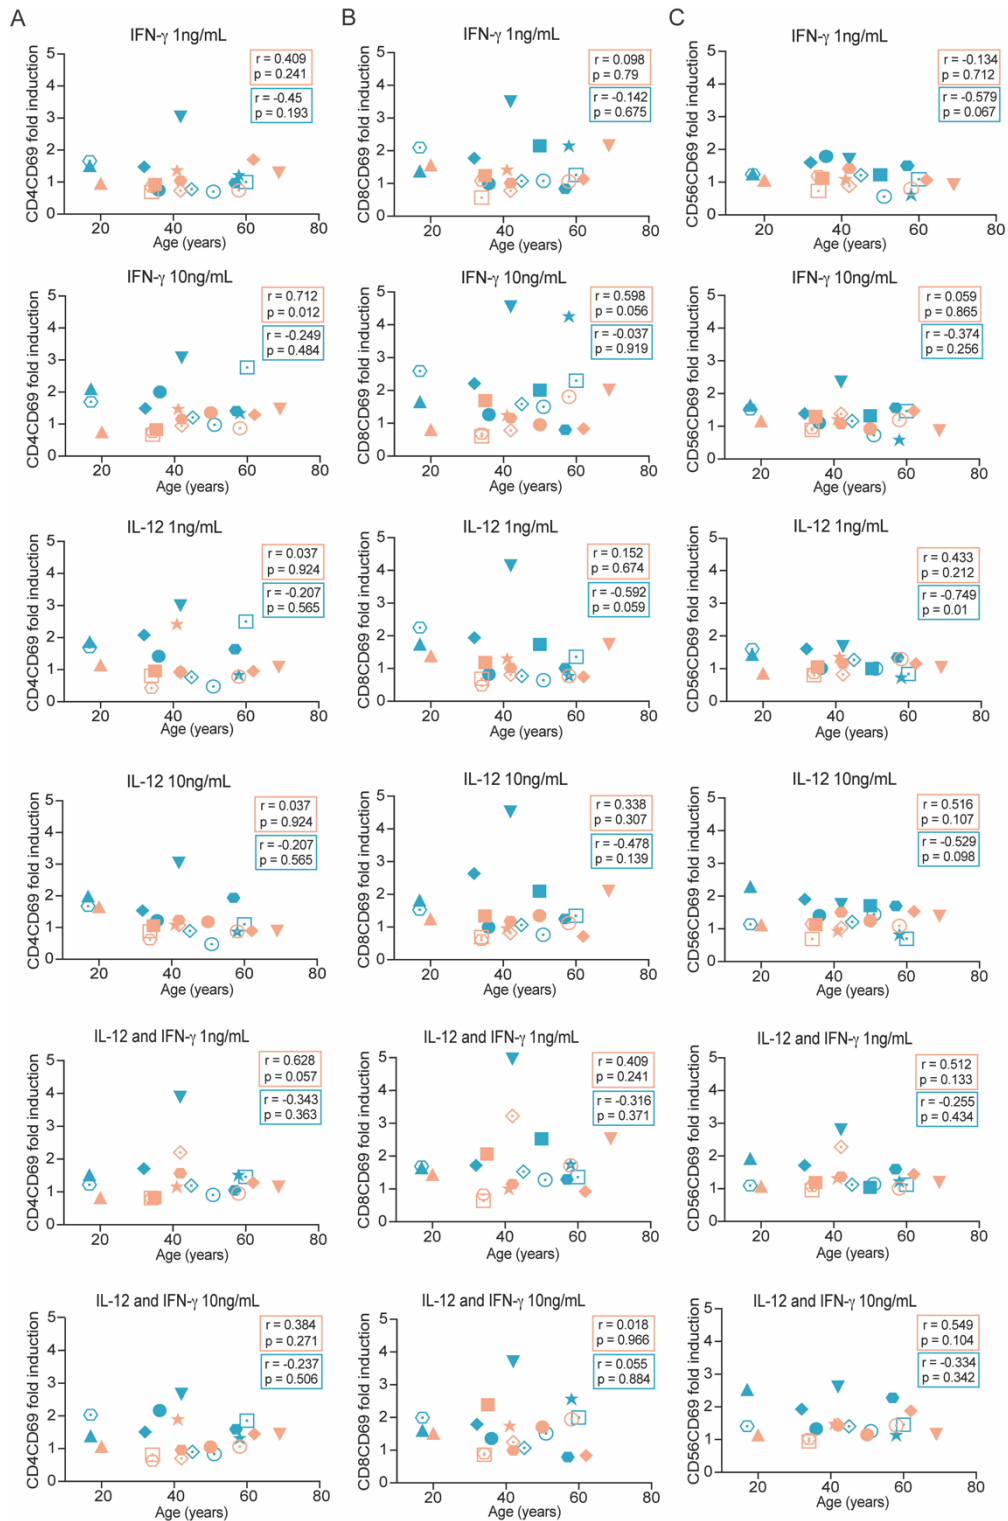

**SF13. Immune cell activation treating with IFN- $\gamma$  and IL-12 shows no correlation with age.** Fold induction CD4 T cells (A), CD8 T cells (B), and NK cells (C) treated with IFN- $\gamma$  at 1 and 10ng/mL (first and second), IL-12 at 1 and 10ng/mL (third and fourth panels), and a combination of both IFN- $\gamma$  and IL-12 at 1 and 10ng/mL (fifth and sixth panels). Teal symbols are female donors, and peach symbols are male donors. Nonparametric spearman correlation was used to calculate  $r$  and  $p$  values.
